# Supplementary material
Source: PubMed Central journal article supplement (PMC3103941)
Supplement: NIHMS125381-supplement-06.pdf [file NIHMS125381-supplement-06.pdf]

1  
2  
3 **Supplementary figure legends**  
4  
5

6 **Supplementary Fig. 1C** – Western blotting showed changes in biochemical markers of  
7 neuronal differentiation and cell proliferation. Treatments: control, 0.5  $\mu$ M 4-HPR for 72  
8 h, 25  $\mu$ M GST for 24 h, and 0.5  $\mu$ M 4-HPR for 48 h (pretreatment) + 25  $\mu$ M GST for 24 h.  
9 The OD value of the band in each control treatment was designated as 100. The  
10 change in level of expression was shown in a treatment relative to control. (a) Mean  
11 values (with SEM) show changes in the levels of expression of N-Myc, Notch-1, Hes-1,  
12 Id2, Fibronectin, hTERT, and PCNA. (b) Mean values (with SEM) show changes in the  
13 levels of expression of e-cadherin. Data presented here were obtained from three  
14 independent experiments.  
15  
16  
17  
18  
19  
20  
21  
22

23  
24 **Supplementary Fig. 3A** – Flow cytometric analysis of cell cycle. Treatments: control,  
25 0.5  $\mu$ M 4-HPR for 72 h, 25  $\mu$ M GST for 24 h, and 0.5  $\mu$ M 4-HPR for 48 h (pretreatment)  
26 + 25  $\mu$ M GST for 24 h. The bar graphs show the differential distribution of cell  
27 populations in the G0/G1 (a), G2/M (b), S (c), and sub G1 (d) phases. Data presented  
28 here were obtained from three independent experiments.  
29  
30  
31  
32  
33

34  
35 **Supplementary Fig. 3B** – Western blotting to examine changes in cytosolic levels of  
36 molecular markers associated with cell cycle arrest at G1/S phase. Treatments: control,  
37 0.5  $\mu$ M 4-HPR for 72 h, 25  $\mu$ M GST for 24 h, and 0.5  $\mu$ M 4-HPR for 48 h (pretreatment)  
38 + 25  $\mu$ M GST for 24 h. The OD value of the band in each control treatment was  
39 designated as 100. The change in level of expression was shown in a treatment  
40 relative to control. (a) Mean values (with SEM) show changes in the levels of  
41 expression of acetylated p53 (Ac-p53), p53, CDK2, Rb, pRB, E2F1, MAD2, and survivin.  
42 (b) Mean values (with SEM) show changes in the levels of expression of p21. Data  
43 presented here were obtained from three independent experiments.  
44  
45  
46  
47  
48  
49  
50  
51

52  
53 **Supplementary Fig. 5** – Western blotting to examine the changes in levels of  
54 angiogenic, invasive, and survival factors. Treatments: control, 0.5  $\mu$ M 4-HPR for 72 h,  
55 25  $\mu$ M GST for 24 h, and 0.5  $\mu$ M 4-HPR for 48 h (pretreatment) + 25  $\mu$ M GST for 24 h.  
56  
57  
58  
59  
60  
61  
62  
63  
64  
65

1  
2  
3 The OD value of the band in each control treatment was designated as 100. The  
4 change in level of expression was shown in a treatment relative to control. Mean values  
5 (with SEM) show changes in the levels of expression of PTEN, VEGF, b-FGF, EGFR,  
6 MMP-2, MMP-9, p-Akt, NF-κB, and Erk 1/2 in SH-SY5Y cells (a) and SK-N-BE2 cells  
7 (b). Data presented here were obtained from three independent experiments.  
8  
9  
10  
11  
12

13 **Supplementary Fig. 6** – Western blotting to examine the molecular components of the  
14 extrinsic and intrinsic pathways of apoptosis. Treatments: control, 0.5 μM 4-HPR for 72  
15 h, 25 μM GST for 24 h, and 0.5 μM 4-HPR for 48 h (pretreatment) + 25 μM GST for 24 h.  
16 The OD value of the band in each control treatment was designated as 100. The  
17 change in level of expression was shown in a treatment relative to control. (a) Mean  
18 values (with SEM) show changes in the levels of expression of active caspase-8, tBid,  
19 Bax, Bcl-2, active caspase-3, and ICAD fragment. (b) The bar graphs show the  
20 changes in Bx:Bcl-2 ratio. Data presented here were obtained from three independent  
21 experiments.  
22  
23  
24  
25  
26  
27  
28  
29  
30  
31  
32  
33  
34  
35  
36  
37  
38  
39  
40  
41  
42  
43  
44  
45  
46  
47  
48  
49  
50  
51  
52  
53  
54  
55  
56  
57  
58  
59  
60  
61  
62  
63  
64  
65
